# Supplementary material for: A doxorubicin–platinum conjugate system: impacts on PI3K/AKT actuation and apoptosis in breast cancer cells
Source: Royal Society of Chemistry journal article supplement (doi:10.1039/d0ra06708c), 2021-01-01
Supplement: d0ra06708c1.pdf [file d0ra06708c1.pdf]

## SUPPLEMENTARY INFORMATION

### **Doxorubicin-platinum conjugate system: impacts on PI3K/AKT actuation and apoptosis in breast cancer cells**

Puja Patel<sup>1</sup>, Devan Umapathy<sup>2</sup>, Selvambigai Manivannan<sup>3</sup>, Puja Patel<sup>1</sup>, Vinita Manimaran Nadar<sup>1</sup>, Rajiu Venkatesan<sup>4</sup>, Velangani Antony Joseph Arokiyam<sup>2</sup>, Srinivasan Pappu<sup>5</sup>, Kumar Ponnuchamy<sup>1,\*</sup>

<sup>1</sup>Food Chemistry and Molecular Cancer Biology Lab, Department of Animal Health and Management, Alagappa University, Karaikudi – 630 003.

<sup>2</sup>Molecular Oncology Lab, Department of Biochemistry, Bharathidasan University, Tiruchirappalli – 620 024, Tamil Nadu, India.

<sup>3</sup>Department of Biomedical Science and Centre for Membrane Interactions and Dynamics (CMIAD), The University of Sheffield, Western Bank, Sheffield, S10 2TN.

<sup>4</sup>MOE Key Laboratory of Macromolecular Synthesis and Functionalization, Department of Polymer Science and Engineering, Zhejiang University, Hangzhou 310027, China.

<sup>5</sup>Phage Therapy and Molecular Biology Lab, Department of Animal Health and Management, Alagappa University, Karaikudi - 630003, Tamil Nadu, India.

**\* Corresponding author**

**Dr. Ponnuchamy Kumar**

**Email: [kumarp@alagappauniversity.ac.in](mailto:kumarp@alagappauniversity.ac.in)**

**Supplementary Fig. 1** Doxorubicin-platinum conjugate system. (a) Fluorescence quenching studies of doxorubicin ( $10 \mu\text{g mL}^{-1}$ ) at static concentration and addition of platinum octopods at different concentrations ( $0 - 100 \mu\text{g mL}^{-1}$ ). (b) Stern-Volmer plot depicting the interaction of doxorubicin and platinum octopods.

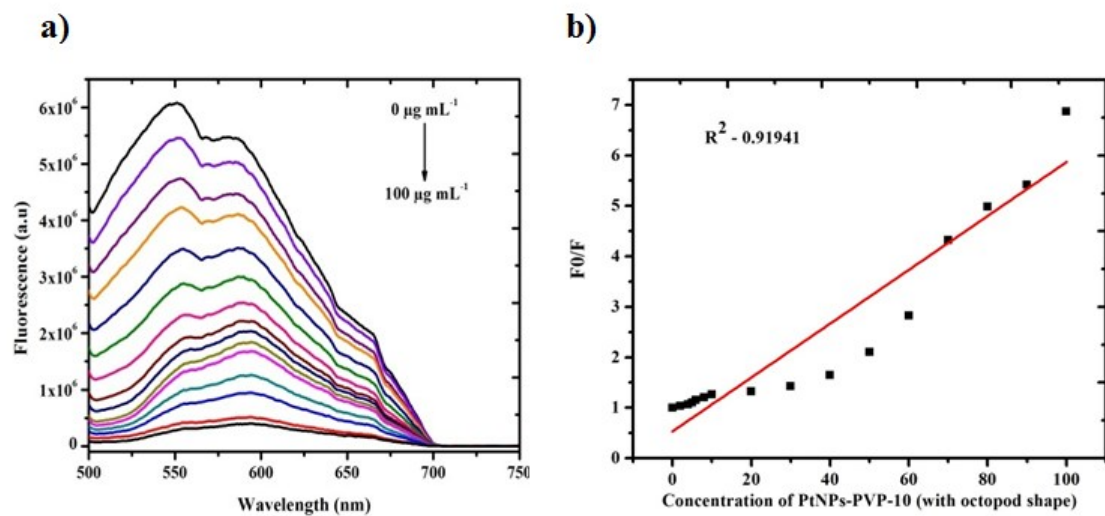

Supplementary Fig. 2 *In vitro* drug release kinetics

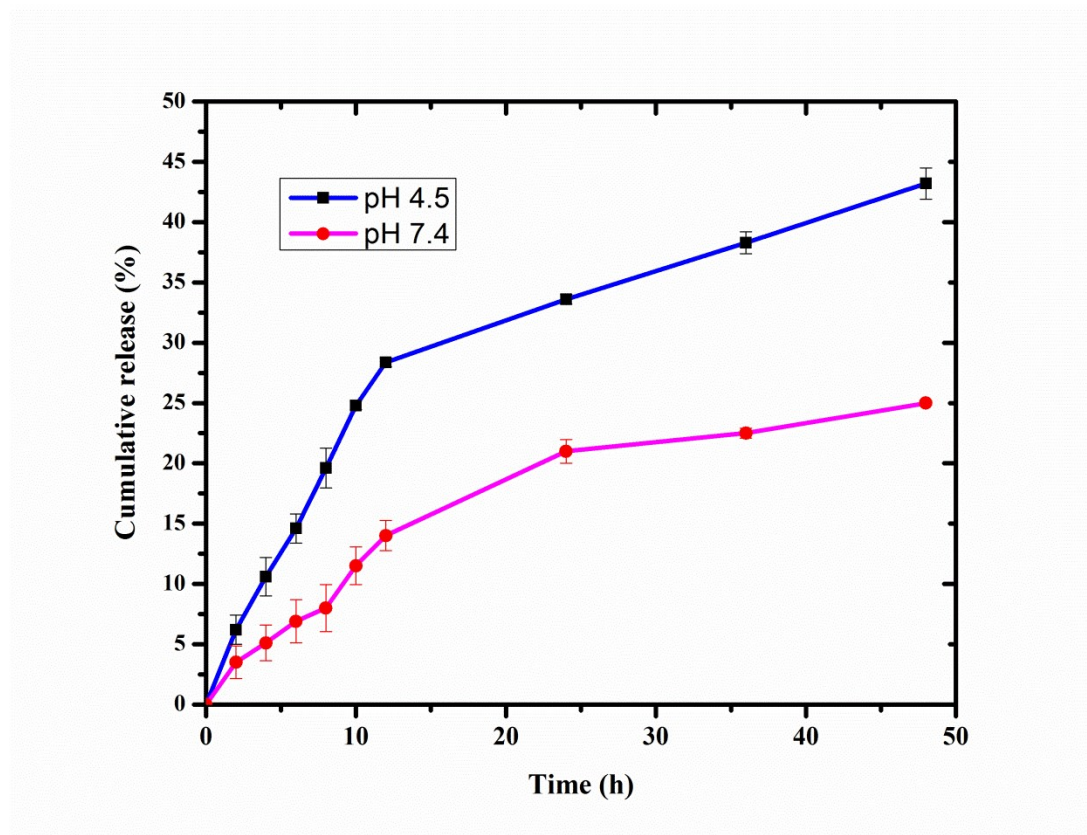

**Supplementary Fig. 2** Relative fluorescence intensity (%) for ROS staining upon treatment with DCFH-DA dye

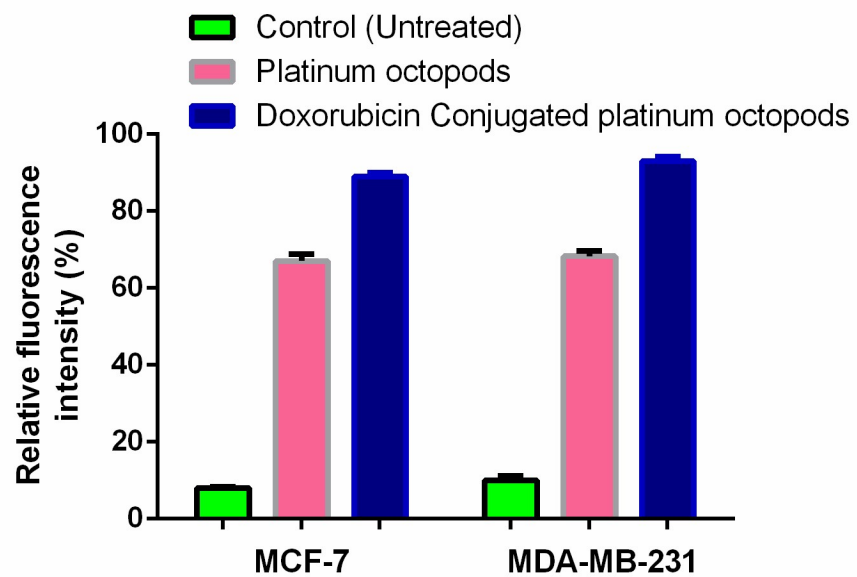

**Supplementary Table. 1** Primers used in the study

| <b>S.No</b> | <b>Gene</b>    | <b>Primers used</b>                                              |
|-------------|----------------|------------------------------------------------------------------|
| 1           | AKT            | F:5'-CAGTGGACCACCTTCGTTGA-3'<br>R:5'-ACAGAGTCGGCCACTGATTG-3'     |
| 2           | PI3K           | F:5'-GGAAGCCCTCCAGAAAGGTC-3'<br>R:5'-GCACTCGGAAGTTGAATGGC-3'     |
| 3           | PTEN           | F:5'-TCCCAGACATGACAGCCATC-3'<br>R:5'-TGTCTTTCAGCACAACTTACTACA-3' |
| 4           | Caspase 9      | F:5'-TGAGACCCTGGACGACATCT-3'<br>R:5'-TCCCTTTCACCGAAACAGCA-3'     |
| 5           | Caspase 8      | F:5'-GCGGAGGGTCGATCATCTAT-3'<br>R:5'-TCCTTCTCCCAGGATGACCC-3'     |
| 6           | Caspase 3      | F:5'-GTGCTATTGTGAGGCGGTTG-3'<br>R:5'-TCCAGAGTCCATTGATTGCTT-3'    |
| 7           | BAX            | F:5'-AGCAAACCTGGTGCTCAAGGC-3'<br>R:5'-CAGGGACATCAGTCGCTTCAG-3'   |
| 8           | BCL-2          | F:5'-F-CTTTGAGTTCGGTGGGGTCA-3'<br>R:5'-GGGCCGTACAGTTCCACAAA-3'   |
| 9           | $\beta$ -actin | F:5'-TGGAACGGTGAAGGTGACAG-3'<br>R:5'-AACAACGCATCTCATATTTGGAA-3'  |

**Supplementary Table. 2** *In vitro* cytotoxicity studies

| S.No | Cells used | IC <sub>50</sub> value (µg mL <sup>-1</sup> ) |           |
|------|------------|-----------------------------------------------|-----------|
|      |            | PtNPs                                         | DOX@PtNPs |
| 1    | MCF-7      | 67.75                                         | 2.099     |
| 2    | MDA-MB-231 | 7.357                                         | 3.196     |
| 3    | HEK-293    | 80.10                                         | 9.036     |
